# Supplementary material for: Ag/Cu-Chitosan Composite Improves Laundry Hygiene and Reduces Silver Emission in Washing Machines
Source: MDPI journal article supplement (doi:10.3390/polym15030695), 2023-01-30
Supplement: s1 [file s1]

## Supplementary material

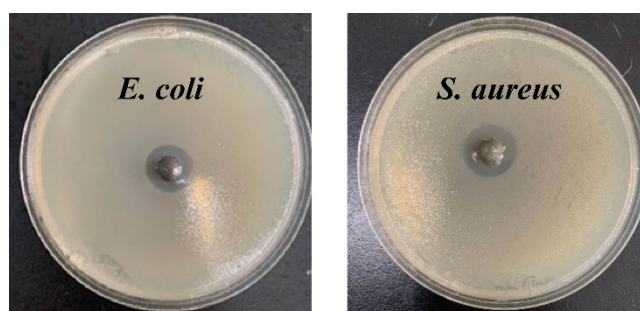

**Figure S1.** Inhibition zone of Ag-CTS composite against *E. coli* and *S. aureus*.

**Table S1.** Polymer dispersity index (PDI) of Ag-CTS composite colloid with different reducing agents.

| Reducing agents    | PDI  |
|--------------------|------|
| Control            | 0.32 |
| Glycerol           | 0.27 |
| Sodium citrate     | 0.42 |
| Sodium borohydride | 0.20 |
